# Supplementary material for: Comparative Genomic Analysis and Species Delimitation: A Case for Two Species in the Zoonotic Cestode Dipylidium caninum
Source: MDPI journal article supplement (doi:10.3390/pathogens12050675), 2023-05-03
Supplement: s1 [file s1]

Table S1. BLAST results of complete mitochondrial genomes

| Accession                                        | OK523384.1   | OK523385.1   | NC_021145.1<br>AB732959.1 | MN099047.1         | MG587892.1                 |
|--------------------------------------------------|--------------|--------------|---------------------------|--------------------|----------------------------|
| Length                                           | 14296 bp     | 13598 bp     | 14296 bp                  | 14226 bp           | 13598 bp                   |
| Host                                             | Canine       | Feline       | Canine                    | Canine             | Feline                     |
| Reference                                        | (This study) | (This study) | (Nakao et al., 2013)      | (Xie et al., 2019) | (Labuschagne et al., 2018) |
| OK523384.1<br>14296 bp<br>Canine<br>(This study) | 100.00%      | 84.26%       | 99.82%                    | 97.65%             | 84.17%                     |
| OK523385.1<br>13598 bp<br>Feline<br>(This study) | 84.26%       | 100.00%      | 84.25%                    | 86.21%             | 99.51%                     |

Labuschagne, M., Beugnet, F., Rehbein, S., Guillot, J., Fourie, J., Crafford, D., 2018. Analysis of *Dipylidium caninum* tapeworms from dogs and cats, or their respective fleas - Part 1. Molecular characterization of *Dipylidium caninum*: genetic analysis supporting two distinct species adapted to dogs and cats. *Parasite* 25, 30.

Nakao, M., Lavikainen, A., Iwaki, T., Haukisalmi, V., Konyaev, S., Oku, Y., Okamoto, M., Ito, A., 2013. Molecular phylogeny of the genus *Taenia* (Cestoda: Taeniidae): proposals for the resurrection of *Hydatigera* Lamarck, 1816 and the creation of a new genus *Versteria*. *Int J Parasitol* 43, 427-437.

Xie, Y., Liu, Y., Gu, X., Meng, X., Wang, L., Li, Y., Zhou, X., Zheng, Y., Zuo, Z., Yang, G., 2019. Complete mitogenome of the dog cucumber tapeworm. *Mitochondrial DNA B Resour* 4, 2670-2672.

Table S2. Cestode species, GenBank accession numbers and numbers of genes used in the BUSCO analysis. There were 128 ortholog genes present in all genomes listed.

| <b>Species</b>                     | <b>GenBank Accession for<br/>genomes</b> | <b>Number of complete and<br/>single-copy ortholog<br/>genes</b> |
|------------------------------------|------------------------------------------|------------------------------------------------------------------|
| <i>Hymenolepis microstoma</i>      | GCA_000469805.3                          | 619                                                              |
| <i>Hymenolepis nana</i>            | GCA_900617975.1                          | 560                                                              |
| <i>Hymenolepis diminuta</i>        | GCA_900708905.1                          | 602                                                              |
| <i>Spirometra erinaceieuropaei</i> | GCA_902702965.1                          | 501                                                              |
| <i>Echinococcus multilocularis</i> | GCA_000469725.3                          | 511                                                              |
| <i>Echinococcus granulosus</i>     | GCA_000524195.1                          | 513                                                              |
| <i>Taenia asiatica</i>             | GCA_001693035.2                          | 490                                                              |
| <i>Taenia saginata</i>             | GCA_001693075.2                          | 501                                                              |
| <i>Taenia solium</i>               | GCA_001870725.1                          | 484                                                              |
| <i>Taenia multiceps</i>            | GCA_001923025.3                          | 509                                                              |
| <i>Schistocephalus solidus</i>     | GCA_017591395.1                          | 539                                                              |
| <i>Moniezia expansa</i>            | GCA_019097775.1                          | 531                                                              |
| <i>Echinococcus canadensis</i>     | GCA_900004735.1                          | 515                                                              |
| <i>Mesocestoides corti</i>         | GCA_900604375.1                          | 550                                                              |
| <i>Dipylidium caninum</i> (China)  | GCA_017562135.1                          | 603                                                              |

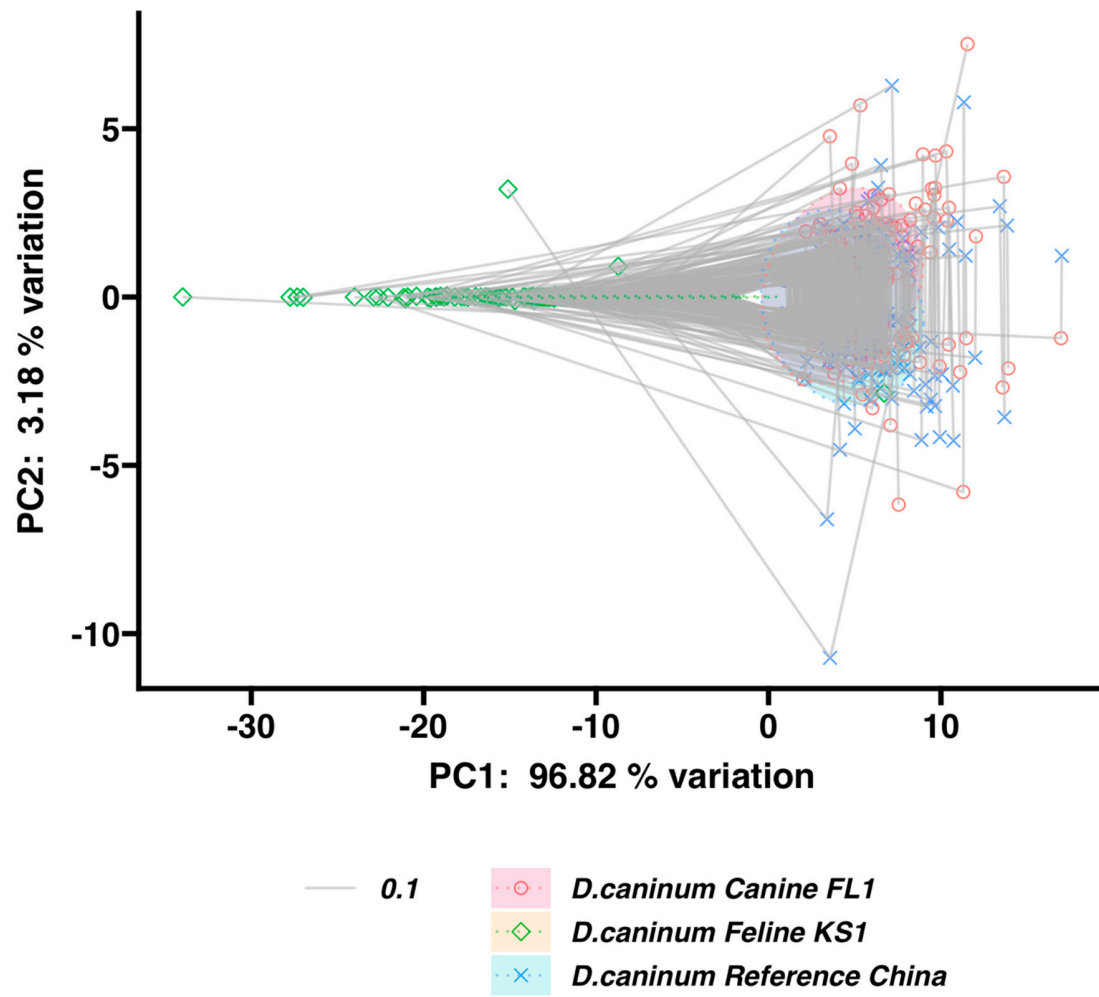

Figure S1. PCA showing the connected positions of components at each gene for each genome.

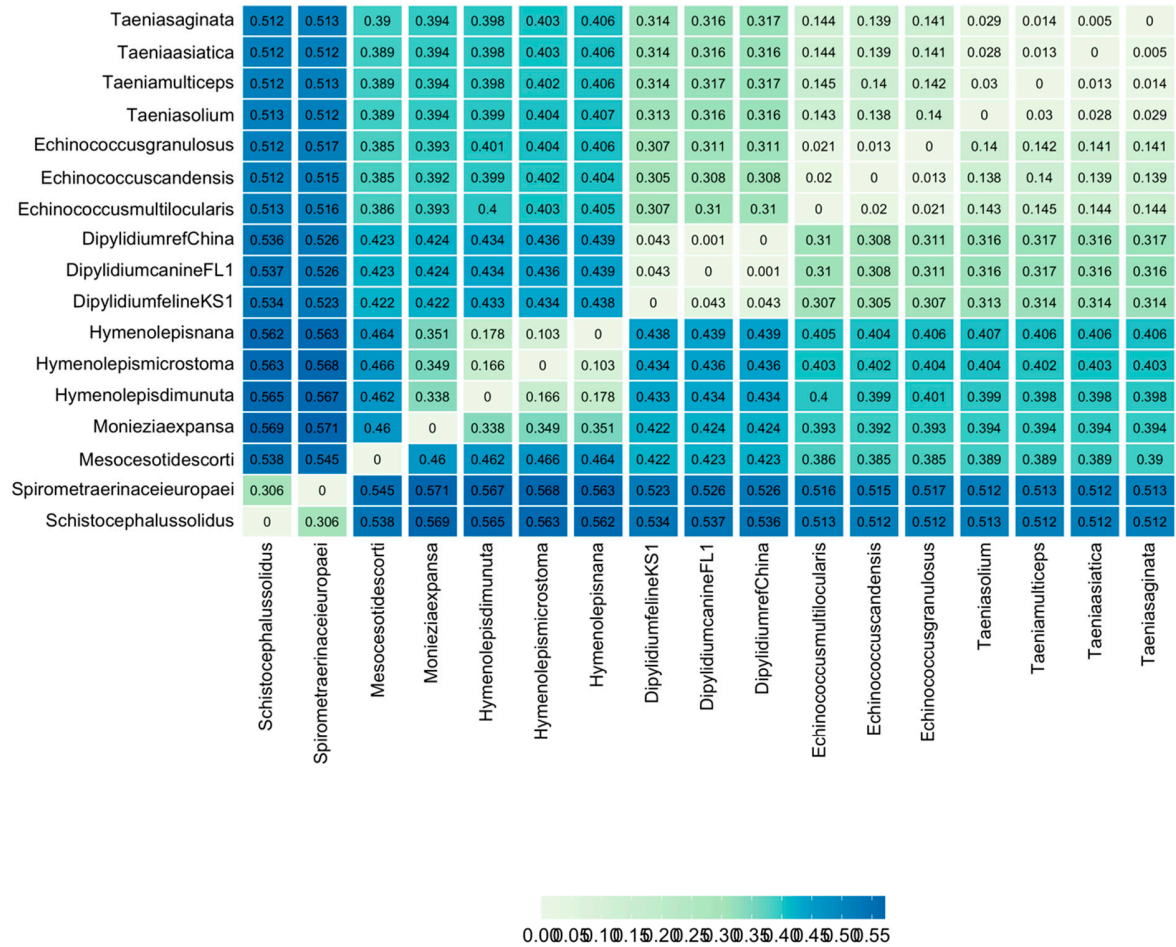

Figure S2. Pairwise genetic distances (Tamura-Nei, 1990) of the 128 gene supermatrix of BUSCOs from cestode species.

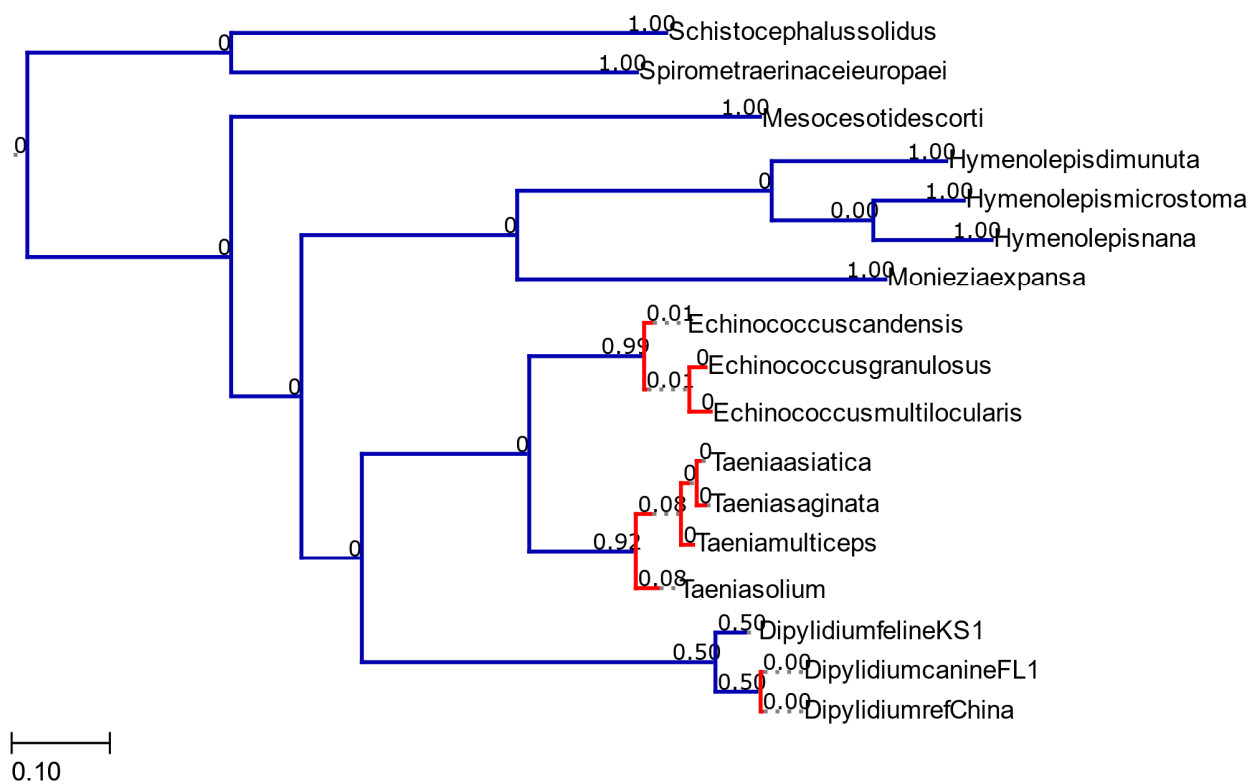

Figure S3. Output of bayesian PTP analysis of the ML phylogenetic tree created with a partitioned supermatrix 128 BUSCO genes in IQTree (See Figure 7). The tree was rooted on the Diphyllbothridean outgroup, with 100,000 MCMC generations, 100 thinning and 0.1 burn-in.

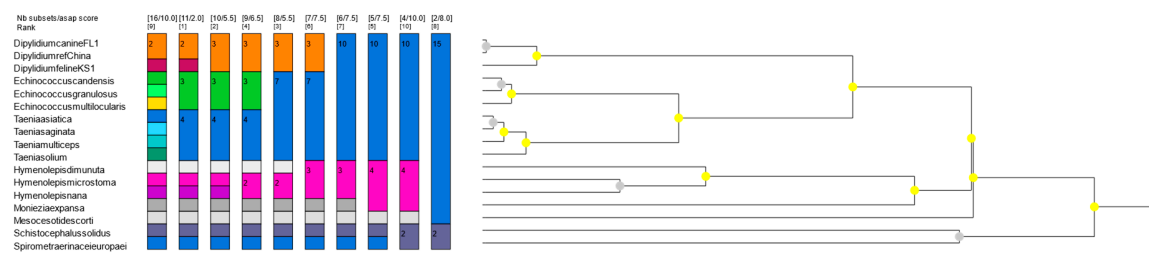

Figure S4: ASAP species delimitation output created with a fasta supermatrix of 128 BUSCO genes and Kimura 80 (Ti/Tv) substitution model.

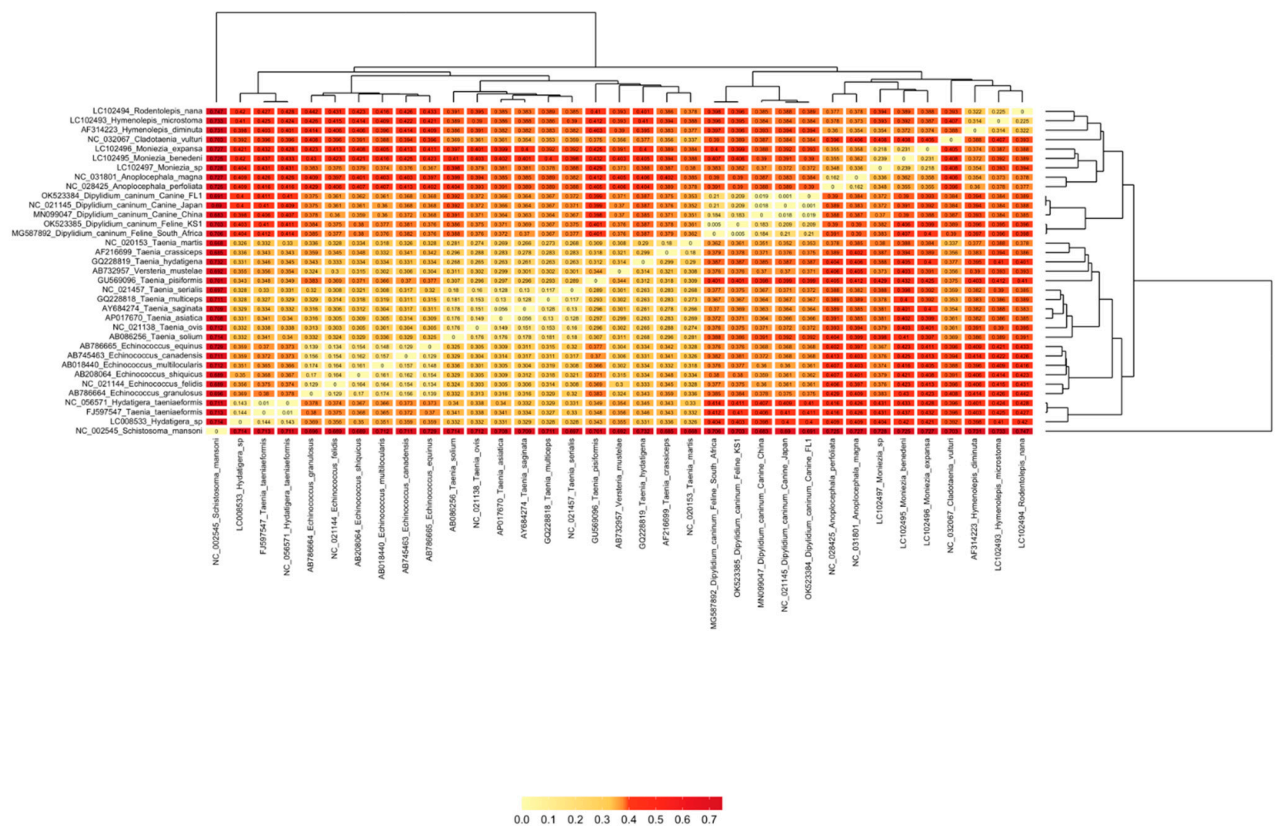

Figure S5. Pairwise genetic distances (Tamura-Nei, 1990) between concatenated 12 protein coding mitochondrial gene datasets.

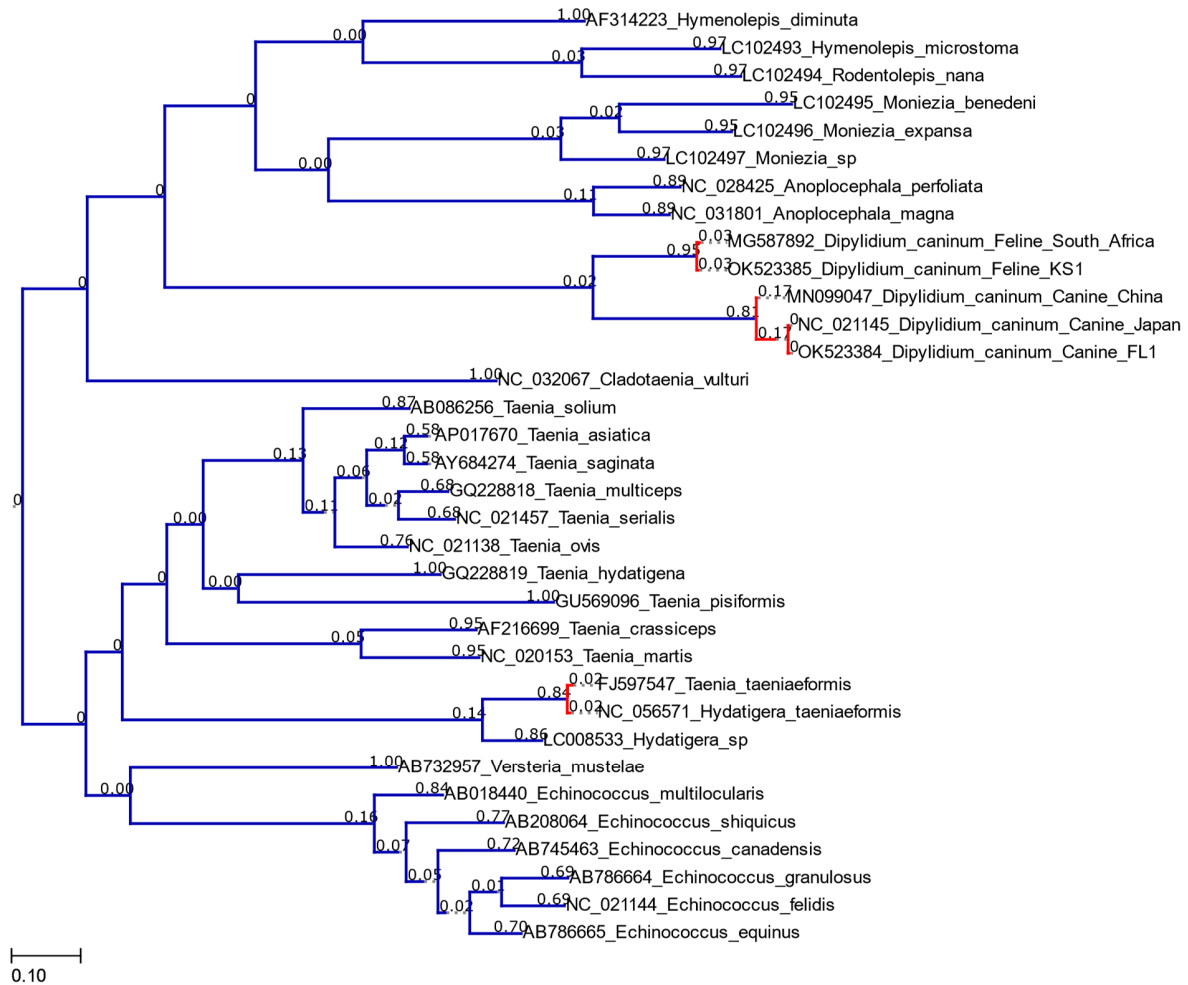

Figure S6. Output of bayesian PTP analysis of the ML phylogenetic tree created with partitioned mitochondrial 12 protein-coding nucleotide supermatrix in IQTree (See Figure 8). The tree was rooted on *Schistosoma mansoni* and the outgroup was removed to improve delimitation. Analysis was performed with 100,000 MCMC generations, 100 thinning and 0.1 burn-in.



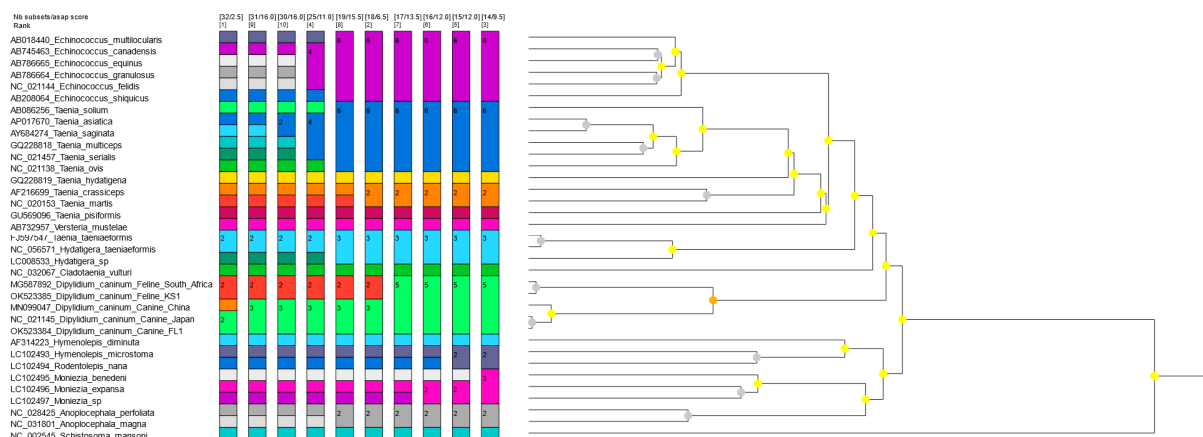

Figure S7: ASAP species delimitation output created with a fasta supermatrix of mitochondrial 12 protein-coding genes and Kimura 80 (Ti/Tv) substitution model.

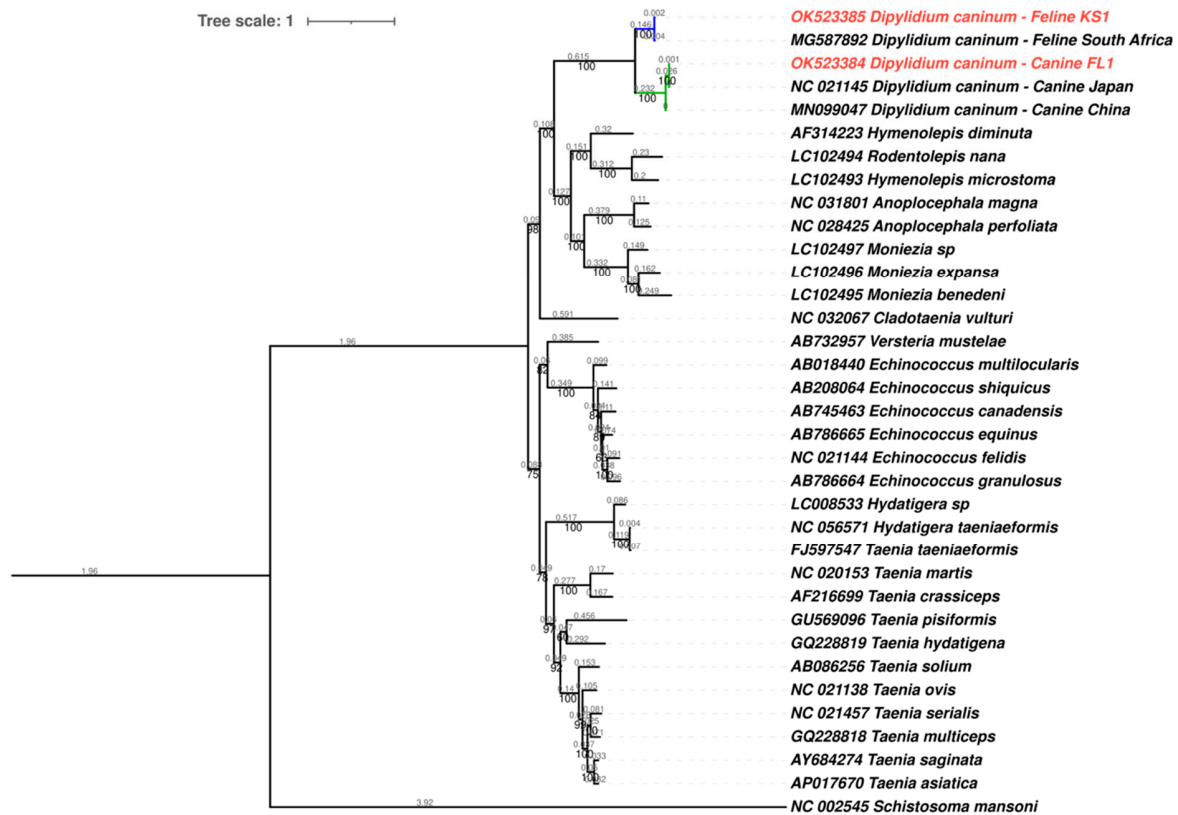

Figure S8. Maximum likelihood nucleotide phylogenetic tree of 12 mitochondrial protein coding genes of *Dipylidium caninum* mitochondrial genomes with branch lengths is available.
